# Supplementary material for: Coupling coordination relationship between ecosystem services and water-land resources for the Daguhe River Basin, China
Source: PLoS One. 2021 Sep 10;16(9):e0257123. doi: 10.1371/journal.pone.0257123 (PMC8432845; doi:10.1371/journal.pone.0257123)
Supplement: S1 Table — (DOCX) [file pone.0257123.s001.docx]

**S1 Table. The economic values of different ecosystem services for eight regions in 2000**

**(Chinese Yuan: RMB)**

| **Districts** | Substance production | Carbon sequestration | Gas regulation | Climate regulation | Water purification | Leisure tourism |
| --- | --- | --- | --- | --- | --- | --- |
| Zhaoyuan | 1.21*106 | 1.47*106 | 1.91*106 | 2.34*106 | 0.29*106 | 0.56*106 |
| Pingdu | 1.82*106 | 2.10*106 | 2.65*106 | 2.63*106 | 0.32*106 | 0.63*106 |
| Jimo | 1.52*106 | 1.47*106 | 2.35*106 | 2.04*106 | 0.25*106 | 0.40*106 |
| Chengyang | 0.30*106 | 0.53*106 | 1.03*106 | 0.58*106 | 0.07*106 | 0.17*106 |
| Xihai’an | 0.81*106 | 0.42*106 | 0.88*106 | 0.73*106 | 0.09*106 | 0.23*106 |
| Gaomi | 0.91*106 | 0.84*106 | 1.18*106 | 1.31*106 | 0.16*106 | 0.26*106 |
| Laixi | 2.02*106 | 1.89*106 | 2.21*106 | 2.63*106 | 0.32*106 | 0.63*106 |
| Jiaozhou | 1.52*106 | 1.79*106 | 2.50*106 | 2.34*106 | 0.29*106 | 0.43*106 |
| Total | 1.01*107 | 1.05*107 | 1.47*107 | 1.46*107 | 0.18*107 | 0.33*107 |
